# Supplementary material for: Las cuatro etapas de crecimiento de la informática
Source: Royal Society of Chemistry journal article supplement (doi:10.1039/d2fo02438a), 1980-01-01
Supplement: d2fo02438a1.pdf [file d2fo02438a1.pdf]

## Supplementary Information

### **Isoquercitrin from *Apocynum venetum* L produces anti-obesity effect for obese mice by targeting C-1-tetrahydrofolate synthase, carbonyl reductase, and glutathione S-transferase P and modification of AMPK/SREBP-1c/FAS/CD36 signaling pathway in mice *in vivo***

Majid Manzoor<sup>1</sup>, Makoto Muroi<sup>2</sup>, Naoko Ogawa<sup>2</sup>, Hiroki Kobayashi<sup>3</sup>, Haruna Nishimura<sup>3</sup>, Danni Chen<sup>1</sup>, Opeyemi Fasina<sup>1</sup>, Jianyu Wang<sup>1</sup>, Hiroyuki Osada<sup>2</sup>, Minoru Yoshida<sup>3,5</sup>, Lan Xiang<sup>1\*</sup> and Jianhua Qi<sup>1\*</sup>

<sup>1</sup>College of Pharmaceutical Sciences, Zhejiang University, 866 Yu Hang Tang Road, Hangzhou, P. R. China;

<sup>2</sup>Chemical Biology Research Group, RIKEN Center for Sustainable Resource Science, Wako-shi, Saitama 351-0198, Japan;

<sup>3</sup>Chemical Genomics Research Group, RIKEN Center for Sustainable Resource Science, 2-1 Hirosawa, Wako, Saitama 351-0198, Japan;

<sup>4</sup>Department of Biotechnology and Collaborative Research Institute for Innovative Microbiology, The University of Tokyo, Yayoi 1-1-1, Bunkyo-ku, Tokyo 113-8657, Japan;

\*Correspondence should be addressed to Lan Xiang (lxiang@zju.edu.cn), Jianhua Qi (qijianhua@zju.edu.cn)

## Supplementary Tables

**Table S1. Effect of Isoquercitrin on blood biochemical parameters of obese mice**

| Groups                           | ALT<br>(U/L)     | AST<br>(U/L)    | TG<br>(mmol/L) | TC<br>(mmol/L)  | Glu (mmol/L)  |
|----------------------------------|------------------|-----------------|----------------|-----------------|---------------|
| ND                               | 44.92 ± 2.56     | 104.10 ± 6.56   | 1.49 ± 0.11    | 4.73 ± 0.20     | 3.40 ± 0.22   |
| HFD                              | 52.27 ± 1.83 #   | 124.24 ± 4.51 # | 2.22 ± 0.11 ## | 8.70 ± 0.46 ### | 7.45 ± 0.89 # |
| HFD + 140 mg/kg<br>Metformin     | 43.05 ± 1.96 **  | 99.65 ± 7.22 *  | 1.98 ± 0.18    | 6.98 ± 0.63 *   | 4.06 ± 0.69 * |
| HFD + 0.1 mg/kg<br>Isoquercitrin | 58.74 ± 3.83     | 118.56 ± 6.87   | 1.71 ± 0.11 *  | 8.66 ± 0.41     | 7.06 ± 0.33   |
| HFD + 5 mg/kg<br>Isoquercitrin   | 40.69 ± 1.75 *** | 102.17 ± 7.07 * | 1.62 ± 0.03 ** | 6.42 ± 0.70 *   | 4.45 ± 0.37 * |

ND: normal diet; HFD: high-fat diet; ALT: alanine aminotransferase; AST: aspartate aminotransferase; TG: triglyceride; TC: total cholesterol; GLU: glucose. Numbers of mice in each group are eight. #, ## and ### represent the difference between ND group and HFD group. \*, \*\*, and \*\*\* represent the difference between HFD group and treatment groups.

**Table S2 · Effect of Isoquercitrin on the weight of individual organs of obese mice**

| Groups                        | Liver                      | Spleen                    | Kidney                   | Heart                    | Epididymal Fat             |
|-------------------------------|----------------------------|---------------------------|--------------------------|--------------------------|----------------------------|
| ND                            | 1.45 ± 0.04                | 0.09 ± 0.01               | 0.58 ± 0.02              | 0.21 ± 0.02              | 1.02 ± 0.15                |
| HFD                           | 2.4 ± 0.12 <sup>###</sup>  | 0.11 ± 0.01               | 0.68 ± 0.04 <sup>#</sup> | 0.22 ± 0.02              | 2.36 ± 0.16 <sup>###</sup> |
| HFD + 140 mg/kg Metformin     | 1.88 ± 0.10 <sup>**</sup>  | 0.11 ± 0.03               | 0.57 ± 0.03 <sup>*</sup> | 0.18 ± 0.01              | 1.07 ± 0.25 <sup>***</sup> |
| HFD + 5 mg/kg AV              | 1.81 ± 0.11 <sup>**</sup>  | 0.10 ± 0.01               | 0.57 ± 0.02 <sup>*</sup> | 0.19 ± 0.01              | 1.62 ± 0.25 <sup>*</sup>   |
| HFD + 0.1 mg/kg Isoquercitrin | 2.06 ± 0.12                | 0.11 ± 0.01               | 0.66 ± 0.03              | 0.22 ± 0.01              | 1.90 ± 0.25                |
| HFD + 0.5 mg/kg Isoquercitrin | 1.60 ± 0.07 <sup>***</sup> | 0.09 ± 0.00               | 0.60 ± 0.02              | 0.17 ± 0.01 <sup>*</sup> | 1.46 ± 0.19 <sup>**</sup>  |
| HFD + 5 mg/kg Isoquercitrin   | 1.56 ± 0.02 <sup>***</sup> | 0.08 ± 0.00 <sup>**</sup> | 0.60 ± 0.01 <sup>*</sup> | 0.17 ± 0.01 <sup>*</sup> | 1.47 ± 0.18 <sup>**</sup>  |

ND: normal diet; HFD: high-fat diet; AV: *A. venetum* L. Numbers of mice in each group are eight. # and <sup>###</sup> represent the difference between ND group and HFD group. \*, \*\* and \*\*\* represent the difference between HFD group and treatment groups.

**Table S3 · Effect of SREBP-1c and AMPK inhibitors on the weight of individual organs of obese mice**

| Groups                                   | Liver                      | Spleen                     | Kidney                    | Heart                     | Epididymal Fat            |
|------------------------------------------|----------------------------|----------------------------|---------------------------|---------------------------|---------------------------|
| ND                                       | 1.35 ± 0.04                | 0.09 ± 0.01                | 0.46 ± 0.03               | 0.18 ± 0.01               | 0.41 ± 0.07               |
| HFD                                      | 1.49 ± 0.04 <sup>#</sup>   | 0.12 ± 0.01 <sup>#</sup>   | 0.66 ± 0.02 <sup>##</sup> | 0.20 ± 0.01               | 0.70 ± 0.06 <sup>##</sup> |
| HFD + 5 mg/kg Isoquercitrin              | 1.36 ± 0.04 <sup>*</sup>   | 0.09 ± 0.00 <sup>*</sup>   | 0.45 ± 0.03 <sup>*</sup>  | 0.16 ± 0.01               | 0.47 ± 0.07 <sup>*</sup>  |
| HFD + 5 mg/kg Isoquercitrin + PF429242   | 1.47 ± 0.4                 | 0.13 ± 0.01                | 0.59 ± 0.03               | 0.22 ± 0.01               | 0.74 ± 0.06               |
| ND                                       | 1.25 ± 0.03                | 0.17 ± 0.01                | 0.50 ± 0.03               | 0.21 ± 0.00               | 0.48 ± 0.09               |
| HFD                                      | 2.27 ± 0.18 <sup>###</sup> | 0.16 ± 0.01                | 0.69 ± 0.06 <sup>#</sup>  | 0.21 ± 0.01               | 1.49 ± .05 <sup>###</sup> |
| HFD + 5 mg/kg Isoquercitrin              | 1.12 ± 0.09 <sup>***</sup> | 0.08 ± 0.00 <sup>***</sup> | 0.46 ± 0.02 <sup>**</sup> | 0.17 ± 0.00 <sup>**</sup> | 0.62 ± .08 <sup>***</sup> |
| HFD + 5 mg/kg Isoquercitrin + Compound C | 2.12 ± 0.09                | 0.12 ± 0.01                | 0.55 ± 0.03               | 0.18 ± 0.01               | 1.34 ± 0.16               |

ND: normal diet; HFD: high-fat diet. Numbers of mice in each group are six. <sup>#</sup> and <sup>##</sup> represent the difference between ND group and HFD group. <sup>\*</sup> represents the difference between HFD group and treatment groups.

**Table S4. Primers sequence in RT-PCR analysis of this study**

| Gene     | Species | Sequences                                        |
|----------|---------|--------------------------------------------------|
| SREBP-1C | mouse   | sense: 5'-GCG CTA CCG GTC TTC TAT CA- 3'         |
|          | mouse   | anti-sense: 5'-TGC TGC CAA AAG ACA AGG G-3'      |
| FAS      | mouse   | sense: 5'-GAT CCT GGA ACG AGA ACA C- 3'          |
|          | mouse   | anti-sense: 5'-AGA CTG TGG AAC ACG GTG GT-3'     |
| SCD1     | mouse   | sense: 5'-CGA GGG TTG GTT GTT GAT CTG T- 3'      |
|          | mouse   | anti-sense: 5'-ATA GCA CTG TTG GCC CTG GA-3'     |
| CD36     | mouse   | sense: 5'-TCC TCT GAC ATT TGC AGG TCT ATC- 3'    |
|          | mouse   | anti-sense: 5'-GTG AAT CCA GTT ATG GGT TCC AC-3' |
| GLUT1    | mouse   | sense: 5'-GTT TCA CAG CCC GCA CAG CTT GA-3'      |
|          | mouse   | anti-sense: 5'-GCC CCT CCC ACG GCC AAC ATA-3'    |
| GLUT2    | mouse   | sense: 5'-CAT CCA TCT TCC TCT TTG TCT G-3'       |
|          | mouse   | anti-sense: 5'-GAT TTT CCT TTG GTT TCT GG-3'     |
| GLUT4    | mouse   | sense: 5'-CCT GCC CGA AAG AGT CTA AAG C-3'       |
|          | mouse   | anti-sense: 5'-ACT AAG AGC ACC GAG ACC AAC G-3'  |
| 18S RNA  | mouse   | sense: 5'-TAA CCC GTT GAA CCC CAT T-3'           |
|          | mouse   | anti-sense: 5'-CCA TCC AAT CGG TAG TAG CG-3'     |

**Supplementary Figures**

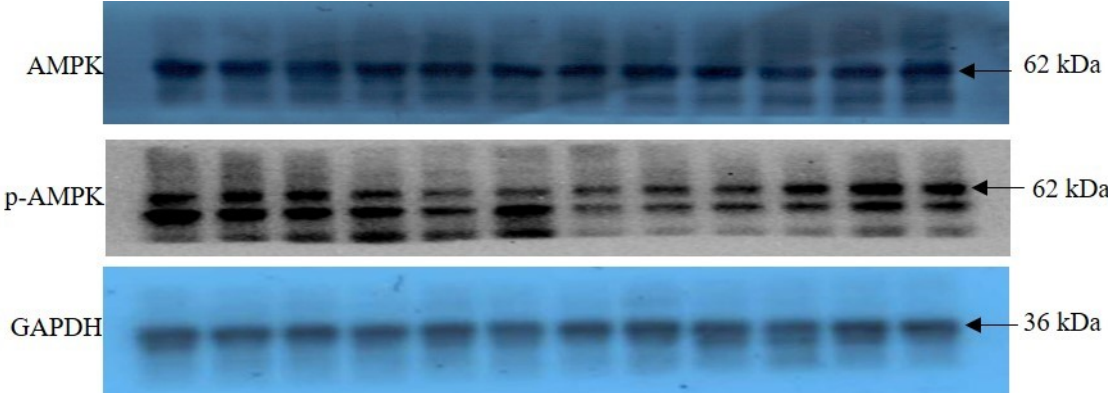

**Supplementary Figure 1. Original western blot analysis of Figure 3C. Original western blot of AMPK, phospholation-AMPK and GAPDH.**

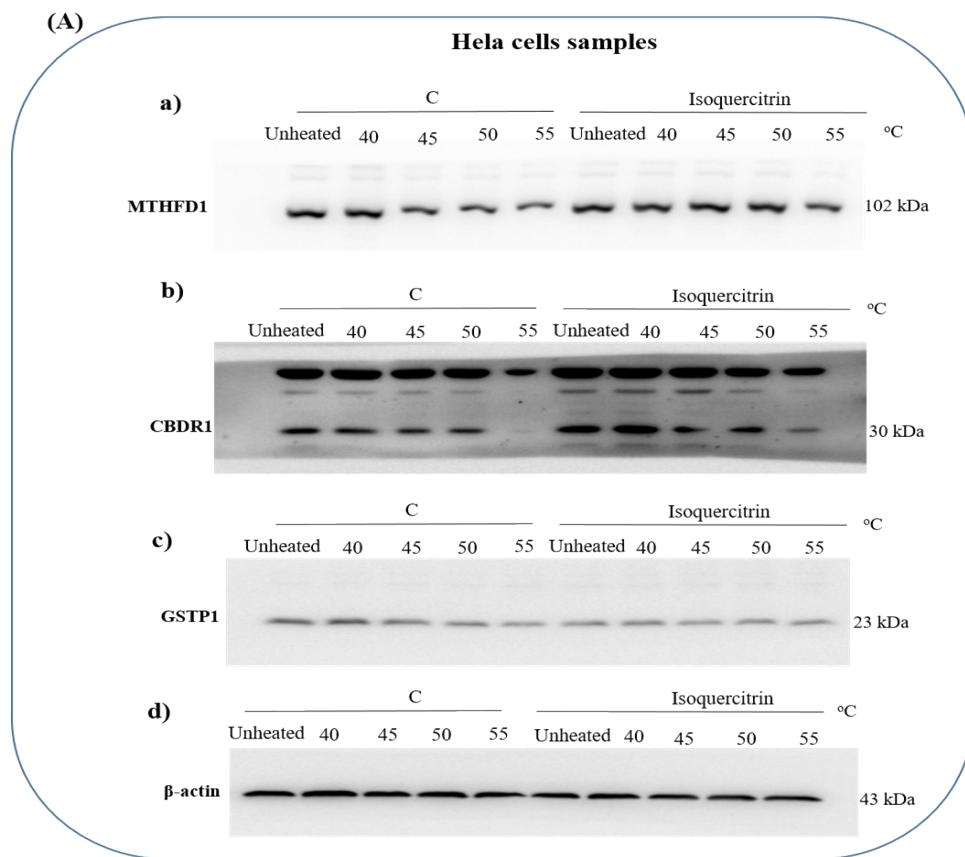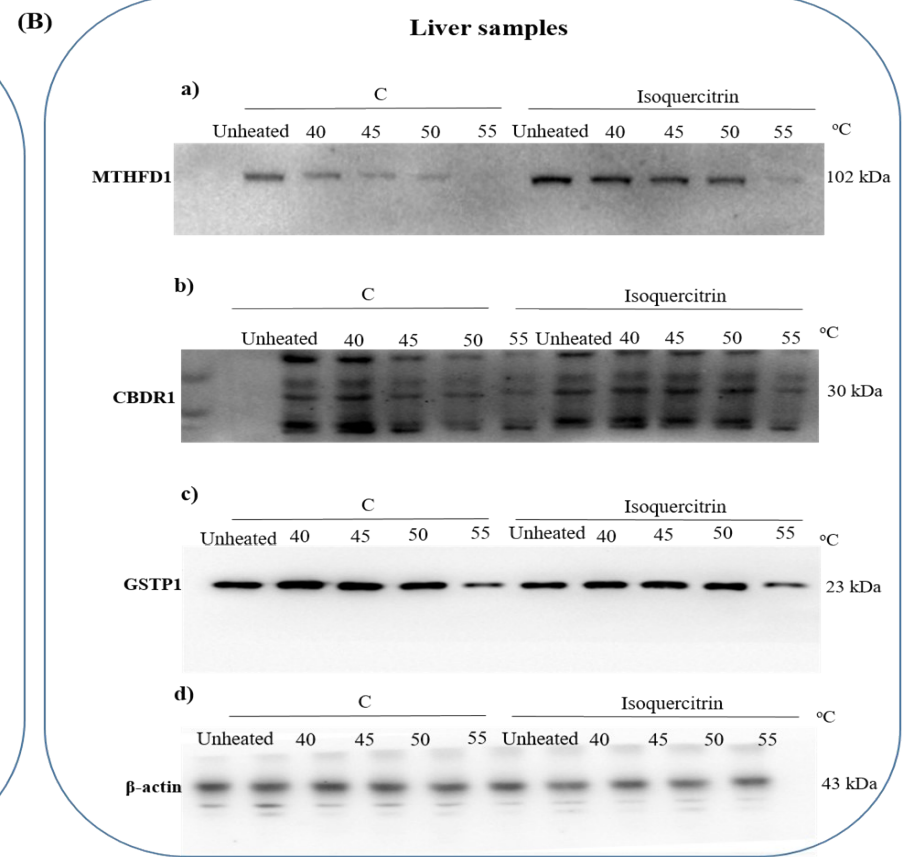

**Supplementary Figure 2. Original western blot analysis of Figure 9.** Original western blot results of MTHFD1 (a), CBDR1 (b), GSTP1 (c) and  $\beta$ -actin (d) in HeLa cells for Figure 9A, 9B and 9C, respectively. Original western blot results of MTHFD1 (a), CBDR1 (b) GSTP1 (c) and  $\beta$ -actin (d) in mice livers for Figure 9D, 9E and 9C, respectively

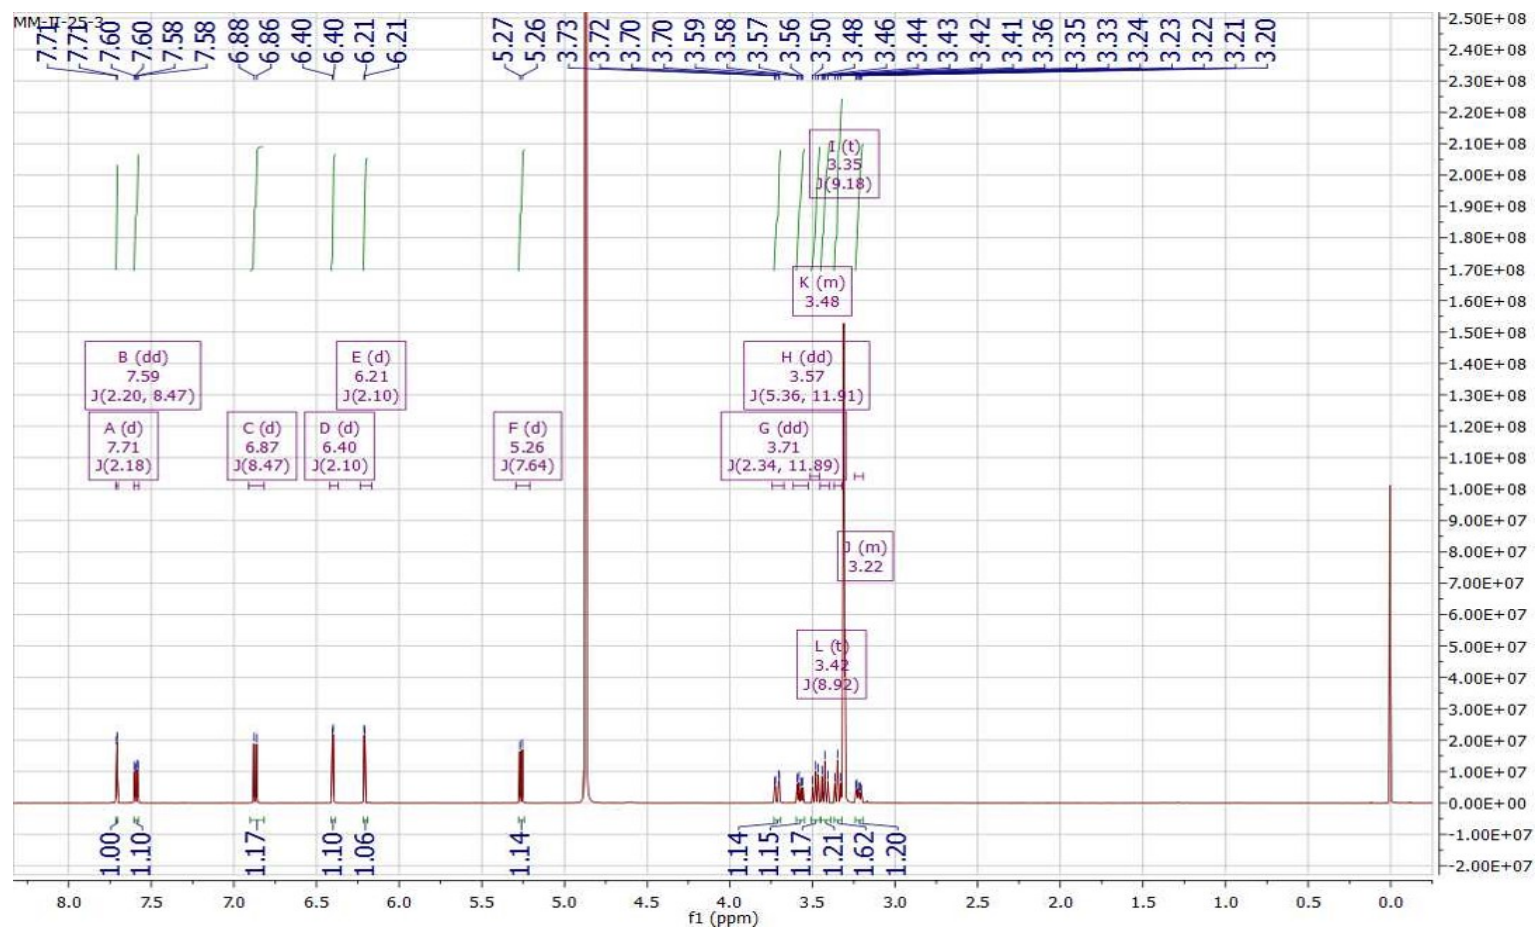

Supplementary Figure 3. The  $^1\text{H}$  NMR spectrum of isoquercitrin from *Apocynum venetum* L
